# Supplementary material for: Identification of Selection Signatures in Commercial Asian Rice Subspecies Deciphered Selection Footprints for Four Overrepresented Biological Processes
Source: Research Square preprint supplement (doi:10.21203/rs.3.rs-121958/v1), 2020-12-08
Supplement: Supplementary file 1 [file 03151e2a0672f4a8a0a93569.csv]

Chromosome	Window start	Window end	ZFST	TajimaD.Aus.	TajimaD.Tro.	Gene stable ID
2	12700001	12800000	3.384979113	-0.765682868	-0.464291708	Os02g0319800; Os02g0319100
1	8150001	8250000	3.370806796	-0.906084711	-1.536654295	Os01g0250200; Os01g0249800; Os01g0248900; Os01g0248350
2	12725001	12825000	3.321432766	-0.765645089	-0.586812335	Os02g0319800; Os02g0319100
2	12750001	12850000	3.292920141	-0.740488529	-0.731689388
1	8175001	8275000	3.28843784	-0.707380481	-1.528521365	Os01g0250200; Os01g0249800; Os01g0248900
5	26500001	26600000	3.232481624	-0.419619499	-1.972606437	Os05g0534800; Os05g0535200; Os05g0534500; Os05g0535533; Os05g0533900; Os05g0534100; Os05g0534000; Os05g0535566
1	8200001	8300000	3.163162501	-0.728195808	-1.40182834	Os01g0250200; Os01g0249800; Os01g0251000; Os01g0251200
1	8600001	8700000	3.109519976	-0.902718549	-1.44390231	Os01g0259300; Os01g0258000; Os01g0259200
10	15200001	15300000	3.079014369	-1.082965163	-0.728761728	Os10g0429651; Os10g0427300; Os10g0428200
1	27600001	27700000	3.055678916	-1.51092483	-1.36580967	ENSRNA049471555; Os01g0673500; Os01g0673400
1	8125001	8225000	3.041804401	-0.813284847	-1.532142264	Os01g0248900; Os01g0248350; Os01g0247900; Os01g0247600
3	31100001	31200000	3.030113767	-1.411459262	-1.686155877	ENSRNA049473235; ENSRNA049473229; ENSRNA049473223; ENSRNA049473214; ENSRNA049473180; ENSRNA049473172; ENSRNA049473164; ENSRNA049473150; ENSRNA049473128; ENSRNA049473108; ENSRNA049473086; ENSRNA049473071; ENSRNA049473057; ENSRNA049473047; ENSRNA049473038; ENSRNA049473030; ENSRNA049473016; ENSRNA049472998; ENSRNA049472987; ENSRNA049472947; ENSRNA049472907; ENSRNA049472901; ENSRNA049472894; Os03g075…
5	26525001	26625000	2.946851406	-0.594590528	-2.0954895	Os05g0534800; Os05g0535700; Os05g0535200; Os05g0534500; Os05g0535533; Os05g0535566; Os05g0536000
6	23600001	23700000	2.946125991	-1.195958966	-1.468926932	Os06g0599400; Os06g0599200; Os06g0600100; Os06g0600301
5	26550001	26650000	2.945790009	-0.739035447	-2.053724595	Os05g0536200; Os05g0536225; Os05g0534800; Os05g0535700; Os05g0535200; Os05g0536250; Os05g0535533; Os05g0535566; Os05g0536000
10	14150001	14250000	2.927234659	-0.842850766	-1.181008871	Os10g0409566
2	12675001	12775000	2.872943079	-0.644842938	-0.496699387	Os02g0318600; Os02g0318851; Os02g0319800; Os02g0319100
10	15225001	15325000	2.839039476	-0.601712383	-0.873303179	Os10g0429651; Os10g0430200; Os10g0428200
8	22850001	22950000	2.835404765	-0.412263817	-0.710818525	Os08g0465700; Os08g0466950
1	8650001	8750000	2.744827167	-1.708395955	-1.545583415	ENSRNA049471239; Os01g0259900; Os01g0259300; Os01g0259966; Os01g0259933; Os01g0259600; Os01g0259200; Os01g0260500
10	15175001	15275000	2.726645978	-0.765699085	-0.780722002	Os10g0427300; Os10g0428200
8	23450001	23550000	2.707594291	-0.452359551	-1.092163245	Os08g0476000; Os08g0477100; Os08g0476900; Os08g0477500; Os08g0476300; Os08g0476100
3	31150001	31250000	2.697797372	-1.524646648	-1.481591744	ENSRNA049446715; ENSRNA049473235; ENSRNA049473229; ENSRNA049473223; ENSRNA049473214; ENSRNA049473180; ENSRNA049473172; ENSRNA049473164; ENSRNA049473150; ENSRNA049473128; ENSRNA049473108; ENSRNA049473086; ENSRNA049473071; ENSRNA049473057; ENSRNA049473047; ENSRNA049473038; ENSRNA049473030; ENSRNA049473016; ENSRNA049472998; ENSRNA049472987; ENSRNA049472954; ENSRNA049472947; ENSRNA049472907; ENSRNA04…
10	14125001	14225000	2.696079284	-0.762006682	-1.193563198	Os10g0409566
3	31125001	31225000	2.653760868	-1.473582497	-1.63433244	ENSRNA049446715; ENSRNA049473235; ENSRNA049473229; ENSRNA049473223; ENSRNA049473214; ENSRNA049473180; ENSRNA049473172; ENSRNA049473164; ENSRNA049473150; ENSRNA049473128; ENSRNA049473108; ENSRNA049473086; ENSRNA049473071; ENSRNA049473057; ENSRNA049473047; ENSRNA049473038; ENSRNA049473030; ENSRNA049473016; ENSRNA049472998; ENSRNA049472987; ENSRNA049472954; ENSRNA049472947; ENSRNA049472907; ENSRNA04…
12	1225001	1325000	2.635449868	-0.514609703	-1.385292644	ENSRNA049443885; Os12g0127500; Os12g0126800; Os12g0127200; Os12g0126600; Os12g0126100
8	22875001	22975000	2.62457628	-0.179127018	-0.71406959	Os08g0467201; Os08g0465700; Os08g0466950; Os08g0467100
3	27325001	27425000	2.616879246	-0.586301264	-1.189323781	Os03g0685600; Os03g0686050; Os03g0685700; Os03g0686500; Os03g0686900; Os03g0685750; Os03g0686100; Os03g0687100; Os03g0685300; Os03g0685800; Os03g0686800
4	15225001	15325000	2.613565245	-1.489106837	-0.740338478	Os04g0329200
8	23475001	23575000	2.608670603	-0.706422073	-1.008485079	Os08g0477100; Os08g0476900; Os08g0477500; Os08g0477900
10	14200001	14300000	2.592978733	-0.971556212	-1.15449961	Os10g0410900; Os10g0410700; Os10g0410750
1	8575001	8675000	2.574942627	-0.390753939	-1.644676714	Os01g0258000
10	14175001	14275000	2.571911156	-0.826587045	-1.173102522	Os10g0409566; Os10g0410700; Os10g0410750
1	8225001	8325000	2.567497579	-0.553514933	-1.163141778	Os01g0250200; Os01g0249800; Os01g0251000; Os01g0251200
6	23625001	23725000	2.549850906	-1.406110513	-1.287270255	Os06g0599400; Os06g0599200; Os06g0600100; Os06g0600301
10	15150001	15250000	2.541474273	-0.612088075	-0.896353017	Os10g0426450; Os10g0426700; Os10g0427300; Os10g0428200; Os10g0426300
12	26900001	27000000	2.523636702	-0.180224637	-1.498756077	Os12g0628400; Os12g0630200; Os12g0628600; Os12g0628500; Os12g0630700
3	33425001	33525000	2.520460148	-1.526180085	-1.444911727	Os03g0801700; Os03g0802400; Os03g0802900; Os03g0801800; Os03g0802100; Os03g0801600; Os03g0802650
4	15975001	16075000	2.518917687	-1.26747184	-1.507694215	Os04g0340100; Os04g0339800
1	8625001	8725000	2.511732261	-1.268162121	-1.29428952	Os01g0259900; Os01g0259300; Os01g0258000; Os01g0259933; Os01g0259600; Os01g0259200
4	12875001	12975000	2.50039288	-0.887146274	-1.53778239	Os04g0295200; Os04g0295100; Os04g0294401
3	33875001	33975000	2.455485878	-0.729472357	-0.935866796	Os03g0810800; Os03g0810100; Os03g0810700; Os03g0809800; Os03g0811300; Os03g0811100
8	23500001	23600000	2.445108627	-0.58428843	-0.966796267	Os08g0477100; Os08g0477500; Os08g0477900; Os08g0478466; Os08g0478500
12	26875001	26975000	2.442138244	-0.266106209	-1.432306562	Os12g0628400; Os12g0630200; Os12g0628300; Os12g0628600; Os12g0628500
2	7975001	8075000	2.433540168	-0.697167767	-0.455456476	Os02g0241600; Os02g0241300
1	27625001	27725000	2.431195932	-1.648225891	-1.319113975	Os01g0673500; Os01g0673400
10	15125001	15225000	2.429325125	-0.560606213	-0.86150209	Os10g0426450; Os10g0426700; Os10g0427300; Os10g0425700; Os10g0426300
9	250001	350000	2.425789682	-0.559065601	-1.537126973	ENSRNA049450015; Os09g0101300
2	8000001	8100000	2.421024851	-0.779457732	-0.681117299	Os02g0241600
9	175001	275000	2.393207098	-0.571774617	-1.627535155	Os09g0101300
2	33125001	33225000	2.393031471	-1.131751834	-1.285645416	ENSRNA049470712; Os02g0782600; Os02g0782500; Os02g0782800; Os02g0783050; Os02g0782100; Os02g0781850; Os02g0783000; Os02g0783100
1	8675001	8775000	2.387342691	-1.397016506	-1.32196262	ENSRNA049471239; Os01g0259900; Os01g0259300; Os01g0259966; Os01g0260800; Os01g0259933; Os01g0259600; Os01g0260700; Os01g0260500; Os01g0259200
2	12775001	12875000	2.381050671	-0.277486168	-0.766569288
5	25950001	26050000	2.358692619	-1.014878468	-0.865383706	Os05g0522600; Os05g0521700; Os05g0521650; Os05g0523200
12	1200001	1300000	2.358173375	-0.582010301	-1.471777807	ENSRNA049443885; Os12g0125500; Os12g0125000; Os12g0126600; Os12g0126100; Os12g0126800
1	27575001	27675000	2.35377507	-0.517805756	-1.019878322	ENSRNA049471555; Os01g0673500; Os01g0672300; Os01g0673400
9	300001	400000	2.348712437	-0.569164494	-1.535131968
3	28600001	28700000	2.336433835	-0.238577149	-1.736456284	Os03g0710900; Os03g0710500; Os03g0710550; Os03g0711150; Os03g0710850; Os03g0710600; Os03g0711100; Os03g0709533; Os03g0710800
6	8000001	8100000	2.334456125	-0.508645493	-1.891160208	Os06g0255300; Os06g0255001; Os06g0254901; Os06g0255100; Os06g0255700
3	31075001	31175000	2.332508959	-1.03268965	-1.583661689	Os03g0755000; Os03g0754500; Os03g0753600; Os03g0754300
1	40250001	40350000	2.319283499	-0.421638317	-1.317154191	Os01g0922100
5	26175001	26275000	2.312953299	-1.071237178	-1.683703507	Os05g0527000; Os05g0528500; Os05g0527600; Os05g0526400; Os05g0528050; Os05g0526600; Os05g0526300; Os05g0527800; Os05g0527900; Os05g0528101; Os05g0526532; Os05g0528000
10	14100001	14200000	2.302759311	-0.893937802	-1.384125567	Os10g0409566; Os10g0408700
11	9575001	9675000	2.299452946	-0.549868279	-1.03021462	Os11g0272550; Os11g0272675
3	33475001	33575000	2.286731459	-1.006045804	-1.36394921	Os03g0803600; Os03g0802400; Os03g0802900; Os03g0802650
3	33900001	34000000	2.28318838	-0.620493872	-1.150942521	Os03g0810800; Os03g0810100; Os03g0810700; Os03g0811300; Os03g0811100
3	32375001	32475000	2.274620847	-1.0750268	-1.054006501	ENSRNA049446523; ENSRNA049473206; ENSRNA049473196; ENSRNA049473141; ENSRNA049472923; ENSRNA049472915; Os03g0780800; Os03g0780900; Os03g0781501; Os03g0781100; Os03g0783100; Os03g0781300; Os03g0781750
3	27300001	27400000	2.273895433	-0.183187412	-1.039975581	Os03g0685600; Os03g0685200; Os03g0686050; Os03g0684700; Os03g0685700; Os03g0686500; Os03g0685000; Os03g0685750; Os03g0686100; Os03g0685100; Os03g0685300; Os03g0685800
1	9050001	9150000	2.272979119	-0.19133261	-0.978246856	Os01g0265800; Os01g0266600; Os01g0266500; Os01g0266000
8	22825001	22925000	2.272154437	-0.166340933	-0.786761988	Os08g0465000; Os08g0465700
6	8025001	8125000	2.265862417	-0.697542766	-1.941681244	Os06g0255300; Os06g0255001; Os06g0254901; Os06g0255700; Os06g0255900; Os06g0255100
5	26575001	26675000	2.260708153	-0.608192844	-2.020968134	Os05g0536200; Os05g0536225; Os05g0535700; Os05g0536900; Os05g0535200; Os05g0536250; Os05g0535533; Os05g0536800; Os05g0535566; Os05g0536000
4	15200001	15300000	2.259914014	-1.197971153	-0.524395988	Os04g0329200
12	1375001	1475000	2.259410042	-0.973442145	-1.529496285	Os12g0129300; Os12g0129000; Os12g0129700; Os12g0128900; Os12g0130200
2	32425001	32525000	2.257348336	-1.09070619	-1.658506032	ENSRNA049470769; ENSRNA049470741; Os02g0769250; Os02g0769700; Os02g0769900; Os02g0770500; Os02g0770600; Os02g0769200
2	8025001	8125000	2.250109459	-1.049820923	-0.771187537
12	1350001	1450000	2.24656638	-0.961591852	-1.377188483	Os12g0129300; Os12g0129000; Os12g0129700; Os12g0128900
4	15925001	16025000	2.240854692	-1.272047815	-1.57236019	Os04g0339800
4	15950001	16050000	2.238831166	-1.113440079	-1.505892858	Os04g0340100; Os04g0339800
2	8050001	8150000	2.232126805	-0.830870809	-0.909767592
3	28575001	28675000	2.231958814	-0.329505021	-1.511177691	Os03g0710500; Os03g0710550; Os03g0710850; Os03g0710600; Os03g0709533; Os03g0710800; Os03g0708700; Os03g0710900
12	1175001	1275000	2.230630159	-0.751181916	-1.542811438	Os12g0125500; Os12g0125000; Os12g0124400; Os12g0126100; Os12g0124500
3	33850001	33950000	2.229080062	-0.737304864	-0.90991716	Os03g0810800; Os03g0809400; Os03g0810100; Os03g0810700; Os03g0809800
12	26825001	26925000	2.227911762	-0.39545932	-1.208411069	Os12g0628400; Os12g0628300; Os12g0628600; Os12g0628500
5	25925001	26025000	2.221451751	-1.109577639	-0.840492399	Os05g0521300; Os05g0521700; Os05g0521650; Os05g0521450; Os05g0522600
6	2650001	2750000	2.205546075	-0.063326856	-1.472270422	ENSRNA049468167; Os06g0152600; Os06g0153200; Os06g0152100; Os06g0152400; Os06g0152200; Os06g0151900; Os06g0153000; Os06g0151600; Os06g0153100; Os06g0152000
3	27075001	27175000	2.201896092	-0.598652722	-0.988727954	Os03g0681800; Os03g0681201
12	1325001	1425000	2.192786408	-0.928137283	-1.444440175	Os12g0129300; Os12g0129000; Os12g0127900; Os12g0128900
3	31175001	31275000	2.184318143	-1.362988137	-1.374133214	ENSRNA049446715; ENSRNA049473235; ENSRNA049473229; ENSRNA049473223; ENSRNA049473214; ENSRNA049473180; ENSRNA049473172; ENSRNA049473164; ENSRNA049473150; ENSRNA049473128; ENSRNA049473108; ENSRNA049473086; ENSRNA049473071; ENSRNA049473057; ENSRNA049473047; ENSRNA049473038; ENSRNA049473030; ENSRNA049473016; ENSRNA049472998; ENSRNA049472987; ENSRNA049472954; ENSRNA049472947; ENSRNA049472907; ENSRNA04…
9	200001	300000	2.18159211	-0.604381986	-1.594654126	ENSRNA049450015; Os09g0101300
4	15250001	15350000	2.171596656	-1.273334493	-1.01176932	Os04g0329200; Os04g0330301
