# Supplementary material for: Identification of Selection Signatures in Commercial Asian Rice Subspecies Deciphered Selection Footprints for Four Overrepresented Biological Processes
Source: Research Square preprint supplement (doi:10.21203/rs.3.rs-121958/v1), 2020-12-08
Supplement: Supplementary file 2 [file 7404a0ab096c237a5c86c82d.csv]

Chromosome	Window start	Window end	ZFST	TajimaD.Tro.	TajimaD.Tem.	Gene stable ID
5	28375001	28475000	4.612917658	-1.278797496	-1.63312434	Os05g0570900
5	28200001	28300000	4.361342092	-1.335245222	-1.457900831	Os05g0567400; Os05g0567200; Os05g0567600; Os05g0566500; Os05g0567650; Os05g0566900; Os05g0568300
3	11525001	11625000	4.233765595	-1.379721775	-1.728922354	ENSRNA049475944; Os03g0320000; Os03g0320850; Os03g0320400; Os03g0320100
5	19600001	19700000	4.154294893	-1.213125581	-0.420209073	Os05g0404300; Os05g0403400; Os05g0402851; Os05g0403600; Os05g0403200; Os05g0402700
5	19575001	19675000	4.133153857	-1.153143143	-0.320337146	Os05g0403400; Os05g0402851; Os05g0403600; Os05g0403200; Os05g0402700
5	28350001	28450000	4.114601141	-1.274401768	-1.767061687	Os05g0569800; Os05g0569750; Os05g0570900; Os05g0569700
12	16800001	16900000	4.077005777	-0.158454958	-0.053523385	Os12g0470000; Os12g0470700
5	28225001	28325000	4.030942906	-1.284349648	-1.603213465	Os05g0567400; Os05g0567200; Os05g0567600; Os05g0567650; Os05g0568800; Os05g0566900; Os05g0568300
5	19625001	19725000	4.019563537	-1.313854921	-0.51667028	Os05g0404300; Os05g0403400; Os05g0403600; Os05g0404600; Os05g0404700; Os05g0405200; Os05g0403200; Os05g0405000
5	19550001	19650000	3.932577461	-1.118603068	-0.456059296	Os05g0402851; Os05g0403200; Os05g0402700; Os05g0403400
5	28325001	28425000	3.908117826	-1.52343867	-1.991004891	Os05g0569800; Os05g0569750; Os05g0569700
5	28175001	28275000	3.878398354	-1.35130965	-1.521787419	Os05g0567400; Os05g0566300; Os05g0566200; Os05g0567200; Os05g0567600; Os05g0566500; Os05g0567650; Os05g0566900
5	28250001	28350000	3.868655174	-1.619209755	-1.727144664	Os05g0567600; Os05g0567650; Os05g0568800; Os05g0568300
9	14400001	14500000	3.800933601	-0.799395428	-0.680035715	Os09g0409000; Os09g0407950; Os09g0408933; Os09g0409100; Os09g0408300
4	10175001	10275000	3.791708086	-0.851229492	-0.489285486
4	7550001	7650000	3.791615645	-0.357426307	-0.338520194	Os04g0213100
4	10200001	10300000	3.76976282	-0.766024668	-0.434820348
5	28300001	28400000	3.766018999	-1.554652036	-1.976382348	Os05g0569800; Os05g0569750; Os05g0568800; Os05g0569700; Os05g0568300
4	10500001	10600000	3.744767034	-0.971204557	-0.407031003
5	27800001	27900000	3.729745528	-0.076349509	-1.761170463	Os05g0559350; Os05g0558900; Os05g0559000; Os05g0559800; Os05g0560200; Os05g0560300; Os05g0560100; Os05g0560500; Os05g0559900
3	11475001	11575000	3.727268134	-1.50977281	-1.9056847	ENSRNA049446912; ENSRNA049475944; Os03g0320000; Os03g0319100; Os03g0318550; Os03g0318600; Os03g0318500; Os03g0320400; Os03g0320100
3	11550001	11650000	3.70109836	-1.369447651	-1.567721196	Os03g0320850; Os03g0320400; Os03g0320100
5	27550001	27650000	3.696162061	-0.118594506	-1.955440772	ENSRNA049450701; ENSRNA049475592; Os05g0554400; Os05g0556000; Os05g0555201; Os05g0554601; Os05g0556100
4	10900001	11000000	3.695348589	-1.190650033	-0.645998151	Os04g0266400
3	11450001	11550000	3.690301363	-1.283337762	-1.875386532	ENSRNA049446912; ENSRNA049475944; Os03g0320000; Os03g0319100; Os03g0318550; Os03g0318025; Os03g0318600; Os03g0318500; Os03g0320100
2	4625001	4725000	3.671609987	-0.054394915	-1.39910432	Os02g0184650; Os02g0184600; Os02g0182850; Os02g0184100; Os02g0184400; Os02g0184700
5	27825001	27925000	3.637934081	-0.065219616	-1.842088865	Os05g0559350; Os05g0559800; Os05g0560200; Os05g0561000; Os05g0560300; Os05g0560100; Os05g0560500; Os05g0559900
4	7575001	7675000	3.632970051	-0.727732794	-0.163810215
3	11500001	11600000	3.618466209	-1.406258996	-1.808082467	ENSRNA049475944; Os03g0320000; Os03g0319100; Os03g0320850; Os03g0320400; Os03g0320100
4	8000001	8100000	3.577727884	-0.470996425	-0.75344725	Os04g0221300; Os04g0219800
3	11575001	11675000	3.572468046	-1.365120609	-1.623448076	Os03g0322200; Os03g0320850; Os03g0321700; Os03g0321900
4	10475001	10575000	3.558629772	-0.779541756	-0.533543624
1	25975001	26075000	3.557169219	-0.998519338	-1.182827994	ENSRNA049451040; Os01g0646300; Os01g0646800; Os01g0646700
5	19650001	19750000	3.551382473	-1.285787368	-0.571446804	Os05g0404300; Os05g0405400; Os05g0403400; Os05g0403600; Os05g0404600; Os05g0404700; Os05g0405000; Os05g0405200
4	8050001	8150000	3.550920273	-0.564766104	-0.949106001	Os04g0221300; Os04g0221450; Os04g0221600
5	27525001	27625000	3.516967046	-0.444046387	-1.972122737	ENSRNA049450701; ENSRNA049475592; Os05g0554400; Os05g0554000; Os05g0555201; Os05g0554601; Os05g0554100; Os05g0553700
4	10925001	11025000	3.516319966	-1.170438706	-0.686098121	Os04g0266400
4	10350001	10450000	3.510875248	-0.607972657	-0.764593414
5	28400001	28500000	3.477051438	-1.572686189	-1.64452339	Os05g0571400; Os05g0570900; Os05g0572000
5	27675001	27775000	3.465533409	-0.025002597	-2.056354813	Os05g0558000; Os05g0557200; Os05g0557100; Os05g0557400; Os05g0557600; Os05g0556600; Os05g0557700
2	4700001	4800000	3.426338832	-0.056549545	-1.18424918	Os02g0184650; Os02g0184700; Os02g0184600; Os02g0185400; Os02g0185200; Os02g0185500; Os02g0184800; Os02g0184400
5	28275001	28375000	3.424092539	-1.6228943	-1.983934474	Os05g0569800; Os05g0569750; Os05g0568800; Os05g0569700; Os05g0568300
4	8125001	8225000	3.422798379	-1.287937689	-1.091682594	Os04g0222250; Os04g0222900; Os04g0221600; Os04g0223000
4	10150001	10250000	3.408451685	-1.06633307	-0.221698442
12	25000001	25100000	3.405641508	-0.705438545	-0.705208321	ENSRNA049444301; Os12g0596201; Os12g0597400; Os12g0596900; Os12g0595900; Os12g0597600; Os12g0596600; Os12g0597051; Os12g0595800; Os12g0597000
5	19450001	19550000	3.401361534	-0.119778463	-0.191291318	Os05g0400100; Os05g0400600; Os05g0401000; Os05g0401050; Os05g0400200; Os05g0401500
4	7975001	8075000	3.395657984	-0.38511438	-0.923933203	Os04g0219800
5	28150001	28250000	3.392699902	-1.311374306	-1.545302755	Os05g0567400; Os05g0566300; Os05g0566200; Os05g0567200; Os05g0566500; Os05g0566900
5	28125001	28225000	3.391757014	-1.46623143	-1.410803476	Os05g0566300; Os05g0566200; Os05g0566500; Os05g0565200; Os05g0565400; Os05g0565701; Os05g0566900
9	14425001	14525000	3.386423224	-0.753014309	-0.918172859	Os09g0409000; Os09g0409312; Os09g0408933; Os09g0409100; Os09g0408300
9	14375001	14475000	3.384546691	-0.921794081	-0.942835701	Os09g0409000; Os09g0407950; Os09g0408933; Os09g0408300
2	4650001	4750000	3.377530492	-0.268165095	-1.34231433	Os02g0184650; Os02g0184700; Os02g0184600; Os02g0184800; Os02g0184100; Os02g0184400
4	8025001	8125000	3.368147828	-0.623759296	-1.018073962	Os04g0221300; Os04g0221450; Os04g0221600
3	10600001	10700000	3.367537724	-0.925363219	-1.665984353	Os03g0303100; Os03g0301700; Os03g0302000; Os03g0301900; Os03g0302850; Os03g0302100; Os03g0301400; Os03g0302700; Os03g0301600; Os03g0302800
3	26975001	27075000	3.359791248	-1.283935079	-0.970204508	Os03g0680100; Os03g0680200; Os03g0680700; Os03g0680500
5	19975001	20075000	3.345989951	-1.397044855	-0.481024251	Os05g0410100; Os05g0409500
3	10575001	10675000	3.325588434	-0.818436161	-1.499826423	Os03g0301700; Os03g0302000; Os03g0301900; Os03g0302100; Os03g0301400; Os03g0302700; Os03g0301600
4	10525001	10625000	3.313885525	-0.858690259	-0.391586997	Os04g0261400
5	19675001	19775000	3.310280364	-1.281103636	-0.727633691	Os05g0404300; Os05g0405400; Os05g0404600; Os05g0404700; Os05g0405000; Os05g0405200
3	11600001	11700000	3.299973299	-1.489909938	-1.534094371	Os03g0322200; Os03g0322800; Os03g0321700; Os03g0321900; Os03g0322900
5	27750001	27850000	3.298900995	-0.228136122	-1.709451501	Os05g0559350; Os05g0558900; Os05g0558000; Os05g0559000
2	4675001	4775000	3.244204224	-0.27574311	-1.239357766	Os02g0184650; Os02g0184700; Os02g0184600; Os02g0185400; Os02g0185200; Os02g0184800; Os02g0184100; Os02g0184400; Os02g0185500
3	26950001	27050000	3.222878307	-1.265398757	-1.052773918	Os03g0680100; Os03g0680200; Os03g0680500
4	9275001	9375000	3.219800054	-1.107768267	-0.445834878	Os04g0244800; Os04g0244400; Os04g0243700
3	10550001	10650000	3.2146419	-0.798759727	-1.517742431	Os03g0301700; Os03g0300300; Os03g0302000; Os03g0301900; Os03g0301400; Os03g0300600; Os03g0301600; Os03g0302100
2	17900001	18000000	3.213024199	-1.328721932	-0.109040943	Os02g0504100; Os02g0504900; Os02g0504200
